# Supplementary material for: Arginine methylation of the C-terminus RGG motif promotes TOP3B topoisomerase activity and stress granule localization
Source: PubMed Central journal article supplement — Nucleic Acids Res. 2018 Feb 19;46(6):3061–74. doi: 10.1093/nar/gky103 (PMC5888246; doi:10.1093/nar/gky103), 2018-02-19
Supplement: gky103_supp.pdf [file gky103_supp.pdf]

# Supplementary Figure 1

CLUSTAL O(1.2.4) multiple sequence alignment

```

TOP3B isoform 1 MKTVLMVAEKPSLAQSI AKILSRGSLSSHKGLNGACSVHEYTGTFAGQPVRFKMTSVCGH
TOP3B isoform 2 -----
TOP3B isoform 3 -----

TOP3B isoform 1 VMTLDFLGKYNKWDKVDPAELFSQAPTEKKEANPKLNMVKFLQVEGRGCDYIVLWLDCCDK
TOP3B isoform 2 -----
TOP3B isoform 3 -----

TOP3B isoform 1 EGENICFEVLDAVLPVMNKAHGGEKTVFRARFSSITDIDICNAMACLGE PDHNEALSVD A
TOP3B isoform 2 -----M NKAHGGEKTVFRARFSSITDIDICNAMACLGE PDHNEALSVD A
TOP3B isoform 3 -----M NKAHGGEKTVFRARFSSITDIDICNAMACLGE PDHNEALSVD A
*****

TOP3B isoform 1 RQELDLRIGCAFTRFQTKYFQGKYGDLSSLSIFGQCPTPTLGF CVERHDKIQSFKPETY
TOP3B isoform 2 RQELDLRIGCAFTRFQTKYFQGKYGDLSSLSIFGQCPTPTLGF CVERHDKIQSFKPETY
TOP3B isoform 3 RQELDLRIGCAFTRFQTKYFQGKYGDLSSLSIFGQCPTPTLGF CVERHDKIQSFKPETY
*****

TOP3B isoform 1 WV LQAKVNTDKDRSLLLDWDRVRFVDFREIAQMFLNMTKLEKEAQVEATSRKEKAKQRPLA
TOP3B isoform 2 WV LQAKVNTDKDRSLLLDWDRVRFVDFREIAQMFLNMTKLEKEAQVEATSRKEKAKQRPLA
TOP3B isoform 3 WV LQAKVNTDKDRSLLLDWDRVRFVDFREIAQMFLNMTKLEKEAQVEATSRKEKAKQRPLA
*****

TOP3B isoform 1 LNTVEMLRVASSSLGMPQHAMQTAERLYTQGYISYPRTE THYPENFDLKGSLRQQANH
TOP3B isoform 2 LNTVEMLRVASSSLGMPQHAMQTAERLYTQGYISYPRTE THYPENFDLKGSLRQQANH
TOP3B isoform 3 LNTVEMLRVASSSLGMPQHAMQTAERLYTQGYISYPRTE THYPENFDLKGSLRQQANH
*****

TOP3B isoform 1 PYWADTVKRLLAEGINRPRKGDAGDHPPITPMKSATEAELGGDAWRLYEYITRHF IATV
TOP3B isoform 2 PYWADTVKRLLAEGINRPRKGDAGDHPPITPMKSATEAELGGDAWRLYEYITRHF IATV
TOP3B isoform 3 PYWADTVKRLLAEGINRPRKGDAGDHPPITPMKSATEAELGGDAWRLYEYITRHF IATV
*****

TOP3B isoform 1 SHDCKYLQSTISFRIGPELFTCSGKTVLSPGFTEVMPWQSVPLEESLPTCQRGDAFPVGE
TOP3B isoform 2 SHDCKYLQSTISFRIGPELFTCSGKTVLSPGFTEVMPWQSVPLEESLPTCQRGDAFPVGE
TOP3B isoform 3 SHDCKYLQSTISFRIGPELFTCSGKTVLSPGFTEVMPWQSVPLEESLPTCQRGDAFPVGE
*****

TOP3B isoform 1 VKMLEKQTNPPDYLTEAELITLMEKHGIGTDASIPVHINN ICORNYVTVESGRRLKPTNL
TOP3B isoform 2 VKMLEKQTNPPDYLTEAELITLMEKHGIGTDASIPVHINN ICORNYVTVESGRRLKPTNL
TOP3B isoform 3 VKMLEKQTNPPDYLTEAELITLMEKHGIGTDASIPVHINN ICORNYVTVESGRRLKPTNL
*****

TOP3B isoform 1 GIVLVHGYKIDAEVLVLP TIRSAVEKQLNLIAQ GKADYRQVLGHTLDVFKRKFHYFVDSI
TOP3B isoform 2 GIVLVHGYKIDAEVLVLP TIRSAVEKQLNLIAQ GKADYRQVLGHTLDVFKRKFHYFVDSI
TOP3B isoform 3 GIVLVHGYKIDAEVLVLP TIRSAVEKQLNLIAQ GKADYRQVLGHTLDVFKRKFHYFVDSI
*****

TOP3B isoform 1 AGMDELMEVFSFPLAATGKPLSRCGKCHRPMKYIQA KPSRLHCSHCDETYTL PQNGTIKL
TOP3B isoform 2 AGMDELMEVFSFPLAATGKPLSRCGKCHRPMKYIQA KPSRLHCSHCDETYTL PQNGTIKL
TOP3B isoform 3 AGMDELMEVFSFPLAATGKPLSRCGKCHRPMKYIQA KPSRLHCSHCDETYTL PQNGTIKL
*****

TOP3B isoform 1 YKELRCPLDDFELVLWSSGSRGKSYPLCPYCYNHPPFRDMKKG MGCNECTHPSCQHSLSM
TOP3B isoform 2 YKELRCPLDDFELVLWSSGSRGKSYPLCPYCYNHPPFRDMKKG MGCNECTHPSCQHSLSM
TOP3B isoform 3 YKELRCPLDDFELVLWSSGSRGKSYPLCPYCYNHPPFRDMKKG E CSH-----S--L
***** . : * :

TOP3B isoform 1 LGIGQCVECESGVLVLDPTSGPKWKVACNKNVVAHCFEN AHRVRSADTCSVCEAALLD
TOP3B isoform 2 LGIGQCVECESGVLVLDPTSGPKWKVACNKNVVAHCFEN AHRVRSADTCSVCEAALLD
TOP3B isoform 3 LSTGSCSLFSVPTPALHQA-GL-----
* . * . . * . : *

TOP3B isoform 1 VDFNKA KSP L P G D E T Q H M G C V F C D P V F Q E L V E L K H A A S C H P M H R G G P G R R Q G R G R A R R
TOP3B isoform 2 VDFNKA KSP L P G D E T Q H M G C V F C D P V F Q E L V E L K H A A S C H P M H R G G P G R R Q G R G R A R R
TOP3B isoform 3 -----

TOP3B isoform 1 PPGKPNRRPKDKMSALAAAYFV
TOP3B isoform 2 PPGKPNRRPKDKMSALAAAYFV
TOP3B isoform 3 -----

```

Isoform 1 (NP\_001269041.1)    Isoform 2 (NP\_001336777.1)    Isoform 3 (NP\_001336780.1)

**Supplementary Figure 1. Amino acid sequence alignment of three TOP3B isoforms.** Clustal Omega alignment was performed using protein sequences of human TOP3B isoforms. The N- and C-terminus of three isoforms are highlighted in blue and red.

## Supplementary Figure 2

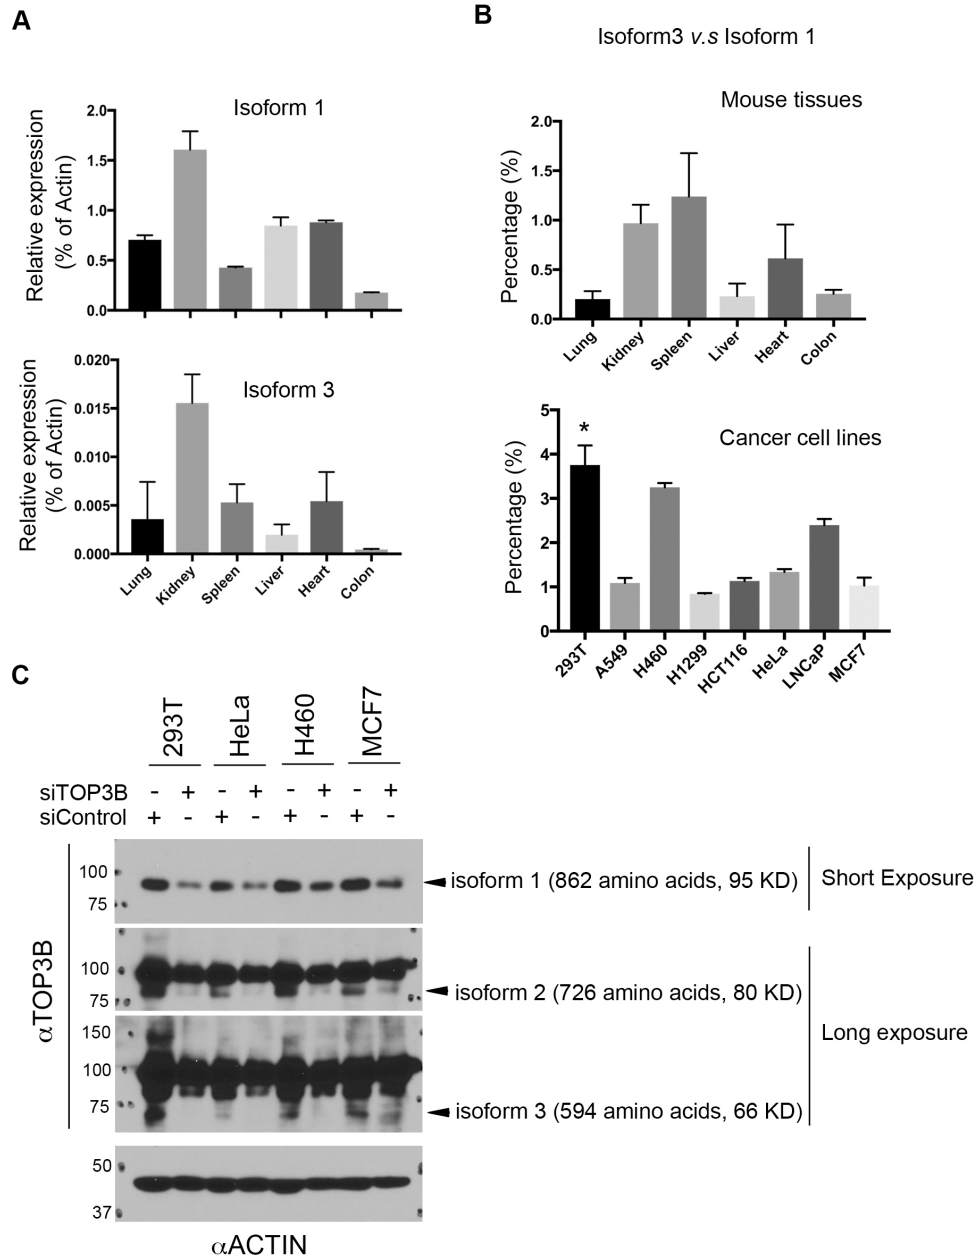

**Supplementary Figure 2. Expression analysis of TOP3B isoform1 and isoform3 in mouse tissues and human cancer cell lines.** (A) The mRNA expression of TOP3B isoform 1 and isoform 3 in mouse tissues were examined by RT-qPCR using isoform-specific primers. (B) The relative expression of isoform 3 compared to isoform 1 was examined in mouse tissues and human cancer cell lines. \* 293T is isolated from human embryonic kidneys. (C) Detection of isoform 1 and isoform 3 in several human cancer cell lines. The cells were transfected with control siRNA or TOP3B specific siRNA. Western blot was performed using anti-TOP3B mouse monoclonal antibody. The protein expression of isoform 3 can be detected in all the cell lines tested.

### Supplementary Figure 3

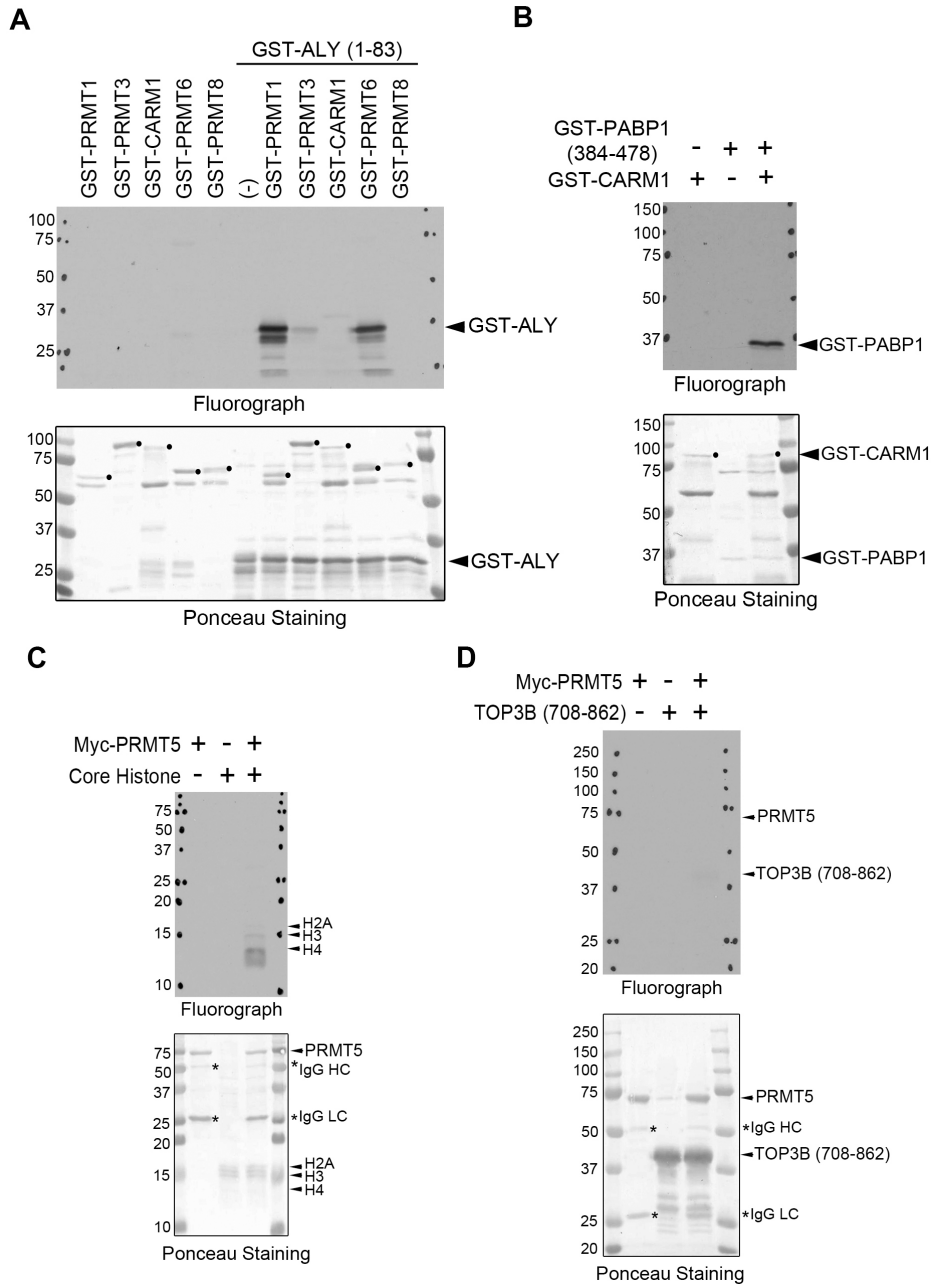

**Supplementary Figure 3. Recombinant PRMTs used in the *in vitro* methylation assays are active and TOP3B C-terminal domain is not methylated by PRMT5. (A) *In vitro* methylation was performed on a known arginine methylated protein REF/ALY to confirm that recombinant PRMT1, PRMT3 and PRMT6 are active. (B) Recombinant CARM1 methylates a known substrate PABP1. (C) Myc-tag PRMT5 was purified from 293T cells and incubated with HeLa cell core histone in an *in vitro* methylation reaction. PRMT5 preferentially methylates H4. H3 and H2A are also methylated but to a lesser extent. (D) *In vitro* methylation was performed by incubating Myc-PRMT5 with TOP3B C-terminal domain (708-862). For the same exposure time as histone substrates (one week), no obvious methylation signal was detected.**

## Supplementary Figure 4

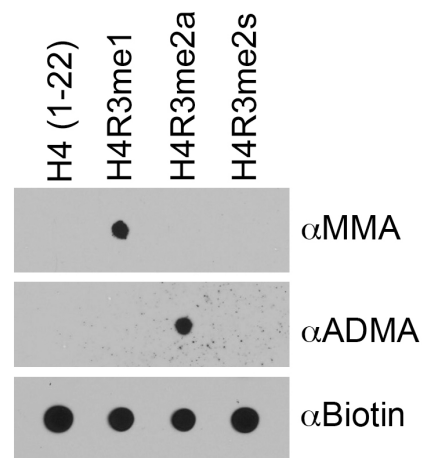

**Supplementary Figure 4. Assess the specificity of MMA and ADMA antibodies.** Dot-blot assays were performed to assess the specificity of pan-MMA and pan-ADMA antibodies using synthetic biotinylated Histone H4 peptides (N-terminus 22 amino acids) carrying defined methylation at arginine 3 site: monomethylation (H4R3me1), asymmetrical dimethylation (H4R3me2a), and symmetrical dimethylation (H4R3me2s). The loading of the peptides was examined using anti-Biotin antibody.

## Supplementary Figure 5

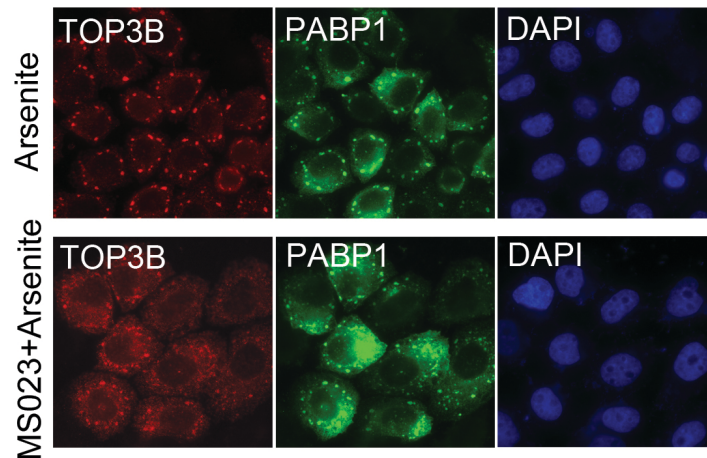

**Supplementary Figure 5. Inhibition of protein arginine methylation reduces TOP3B stress granule localization.** HeLa cells cultured on glass cover slides were untreated or treated with MS023 for 2 days before the cells were treated with 0.5 mM Arsenite for 1 hour. The samples were processed as described in **Figure 5 (A)**, except that anti-TOP3B and anti-PABP1 (marker for stress granules) antibodies were used to examine the endogenous protein localization.

## Supplementary Figure 6

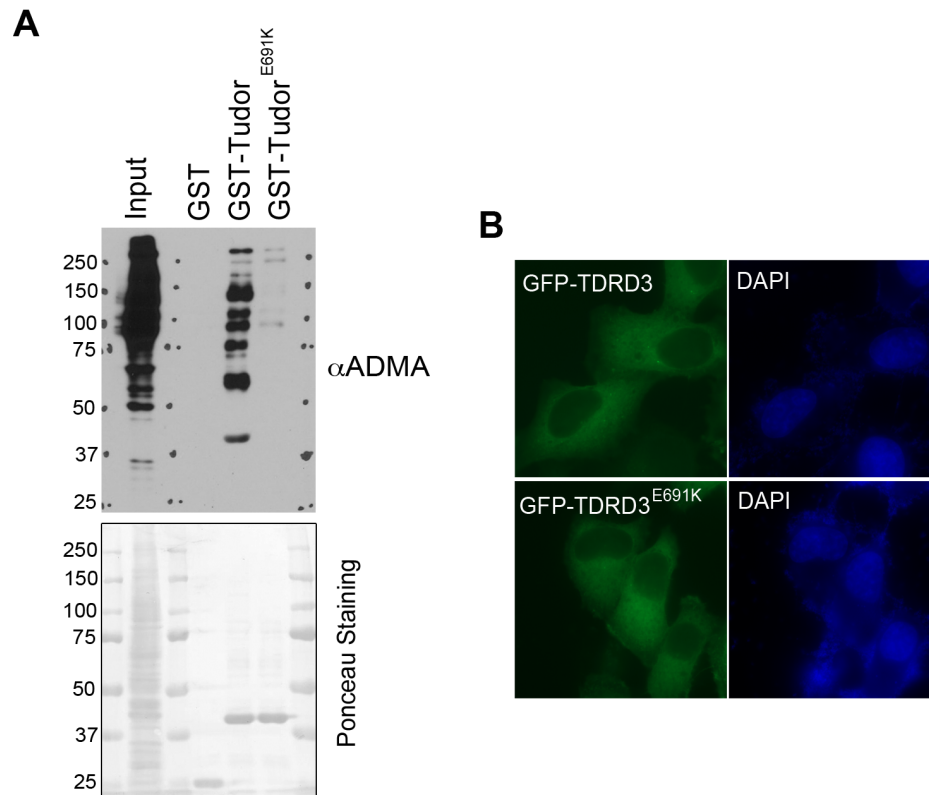

**Supplementary Figure 6. Confirmation of Tudor domain functional mutation and GFP-TDRD3 subcellular localization.** (A) GST-tag recombinant Tudor domain and methylarginine-binding deficient Tudor (E691K) were incubated with HeLa cell lysates. After pull-down, the samples were subjected to western blot detection using ADMA antibody. (B) Both GFP-TDRD3 and GFP-TDRD3 (E691K) were transiently transfected into HeLa cells. The subcellular localization of both proteins was visualized by fluorescence microscope.

## Supplementary Figure 7

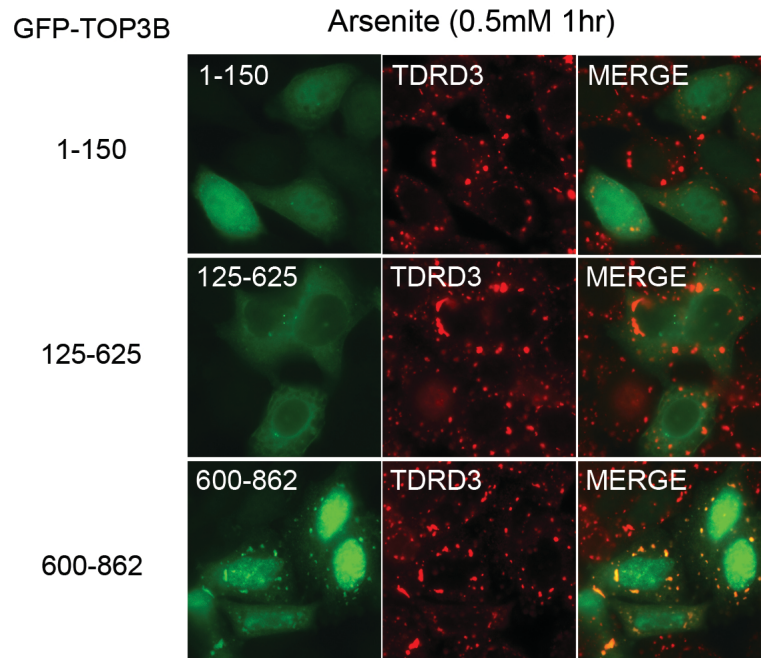

**Supplementary Figure 7. The interaction between TDRD3 OB-fold and TOP3B catalytic domain is not sufficient to mediate their respective recruitment to SGs.** Three TOP3B truncations were expressed as GFP-fusion proteins. After Arsenite treatment, the co-localization of GFP-fusion proteins with TDRD3 (Red) was examined by immunofluorescence. Note that TOP3B (125-625), which is sufficient to interact with TDRD3, doesn't exhibit strong stress granule localization.

**Supplementary Table 1 (RT-qPCR primers)**

|                              |                         |
|------------------------------|-------------------------|
| <i>NRAS</i>                  | CTACAGGGAGCAGATTAAGCG   |
|                              | TAACTCTTGGCCAGTTCGTG    |
| <i>DDX5</i>                  | TGATTTGGAGAGAGGTGTGG    |
|                              | TTCAAAGCCCATATCAAGCA    |
| <i>c-MYC</i>                 | TTCTCTCCGTCTCGGATTCTCTG |
|                              | TCTTCTTGTTCTCCTCAGAGTCG |
| Human <i>TOP3B</i> isoform 1 | CGTCCTTGGCACAGTCAATTG   |
|                              | ATCTTGAAGCGCACTGGCTGG   |
| Human <i>TOP3B</i> isoform 3 | GTCCTGTGGTCATCAGGCTCT   |
|                              | GACTGCAGCTACCTGTGGAC    |
| Mouse <i>Top3b</i> isoform 1 | GCAACACCTGCGAGGCTGCC    |
|                              | GCTGCATGCTTAAGCTCCACCA  |
| Mouse <i>Top3b</i> isoform 3 | GAACTGGTCCTGTGGTCCTC    |
|                              | CTCTCAGCTCACCTGTTACTTG  |

**Supplementary Table 2 (DRIP-qPCR primers)**

|                       |                      |
|-----------------------|----------------------|
| pFC53 R loop fragment | TTTAGAGCTTGACGGGGAAA |
|                       | CAACAGTTGCGTAGCCTGAA |
| <i>c-MYC</i>          | GAGGCTATTCTGCCCATTTG |
|                       | GGTGCTTACCTGGTTTTCCA |
| <i>DDX5</i>           | GTGTCATCGGTGTCCTTCT  |
|                       | ACTCGAATAACCCGACATGG |
| <i>NRAS</i>           | CGTTTCACTGATGCCAGAAA |
|                       | TCCTTCCCATTCTCCCTTCT |



**Supplementary Table 3 (TOP3B site mutagenesis primers)**

|               |                                             |
|---------------|---------------------------------------------|
| R824K         | ctgccaccccatgcac AAA ggtggaccagggagaag      |
|               | cttctccctggtccaccTTTgtgcatggggtggcag        |
| R829/830K     | cgcggtggaccaggg AAAAAG cagggtcgagggcgg      |
|               | ccgccctcgaccctgCTTTTccctggtccaccg           |
| R833/835K     | gggagaaggcaggt AAAGggAAG ggccgggcccaggagg   |
|               | cctcctggcccggccCTTccTTTaccctgccttctccc      |
| R837/839/840K | ggtcgagggcggggc AAGgccAAGAAG cccctgggaagccc |
|               | gggctcccagggggCTTCTTggcCTTgccccgccctcgacc   |
| R848/849K     | gggaagccaacccc AAAAAG ccaaggacaagatg        |
|               | catctgtccttgggCTTTTggggttgggctccc           |
